# Supplementary material
Source: HighWire-hosted journal article supplement (https://bmjopen.bmj.com/content/6/4/e010649)

F3

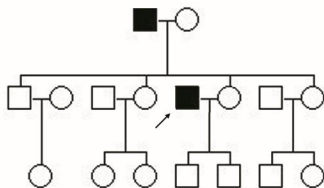

F4

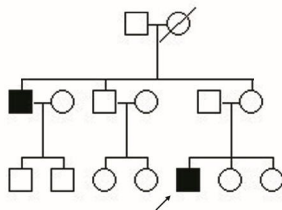

F5

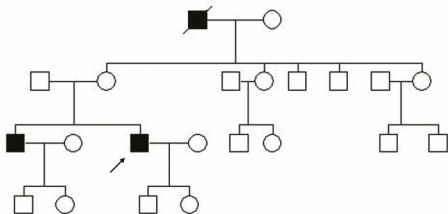

Supplement: inline-supplementary-material-1 [file inline-supplementary-material-1.pdf]
